# Supplementary figures and images for: Metabolite Profile of Treatment-Naive Metabolic Syndrome Subjects in Relation to Cardiovascular Disease Risk
Source: MDPI journal article supplement (doi:10.3390/metabo11040236), 2021-04-13

Receiver operating characteristic

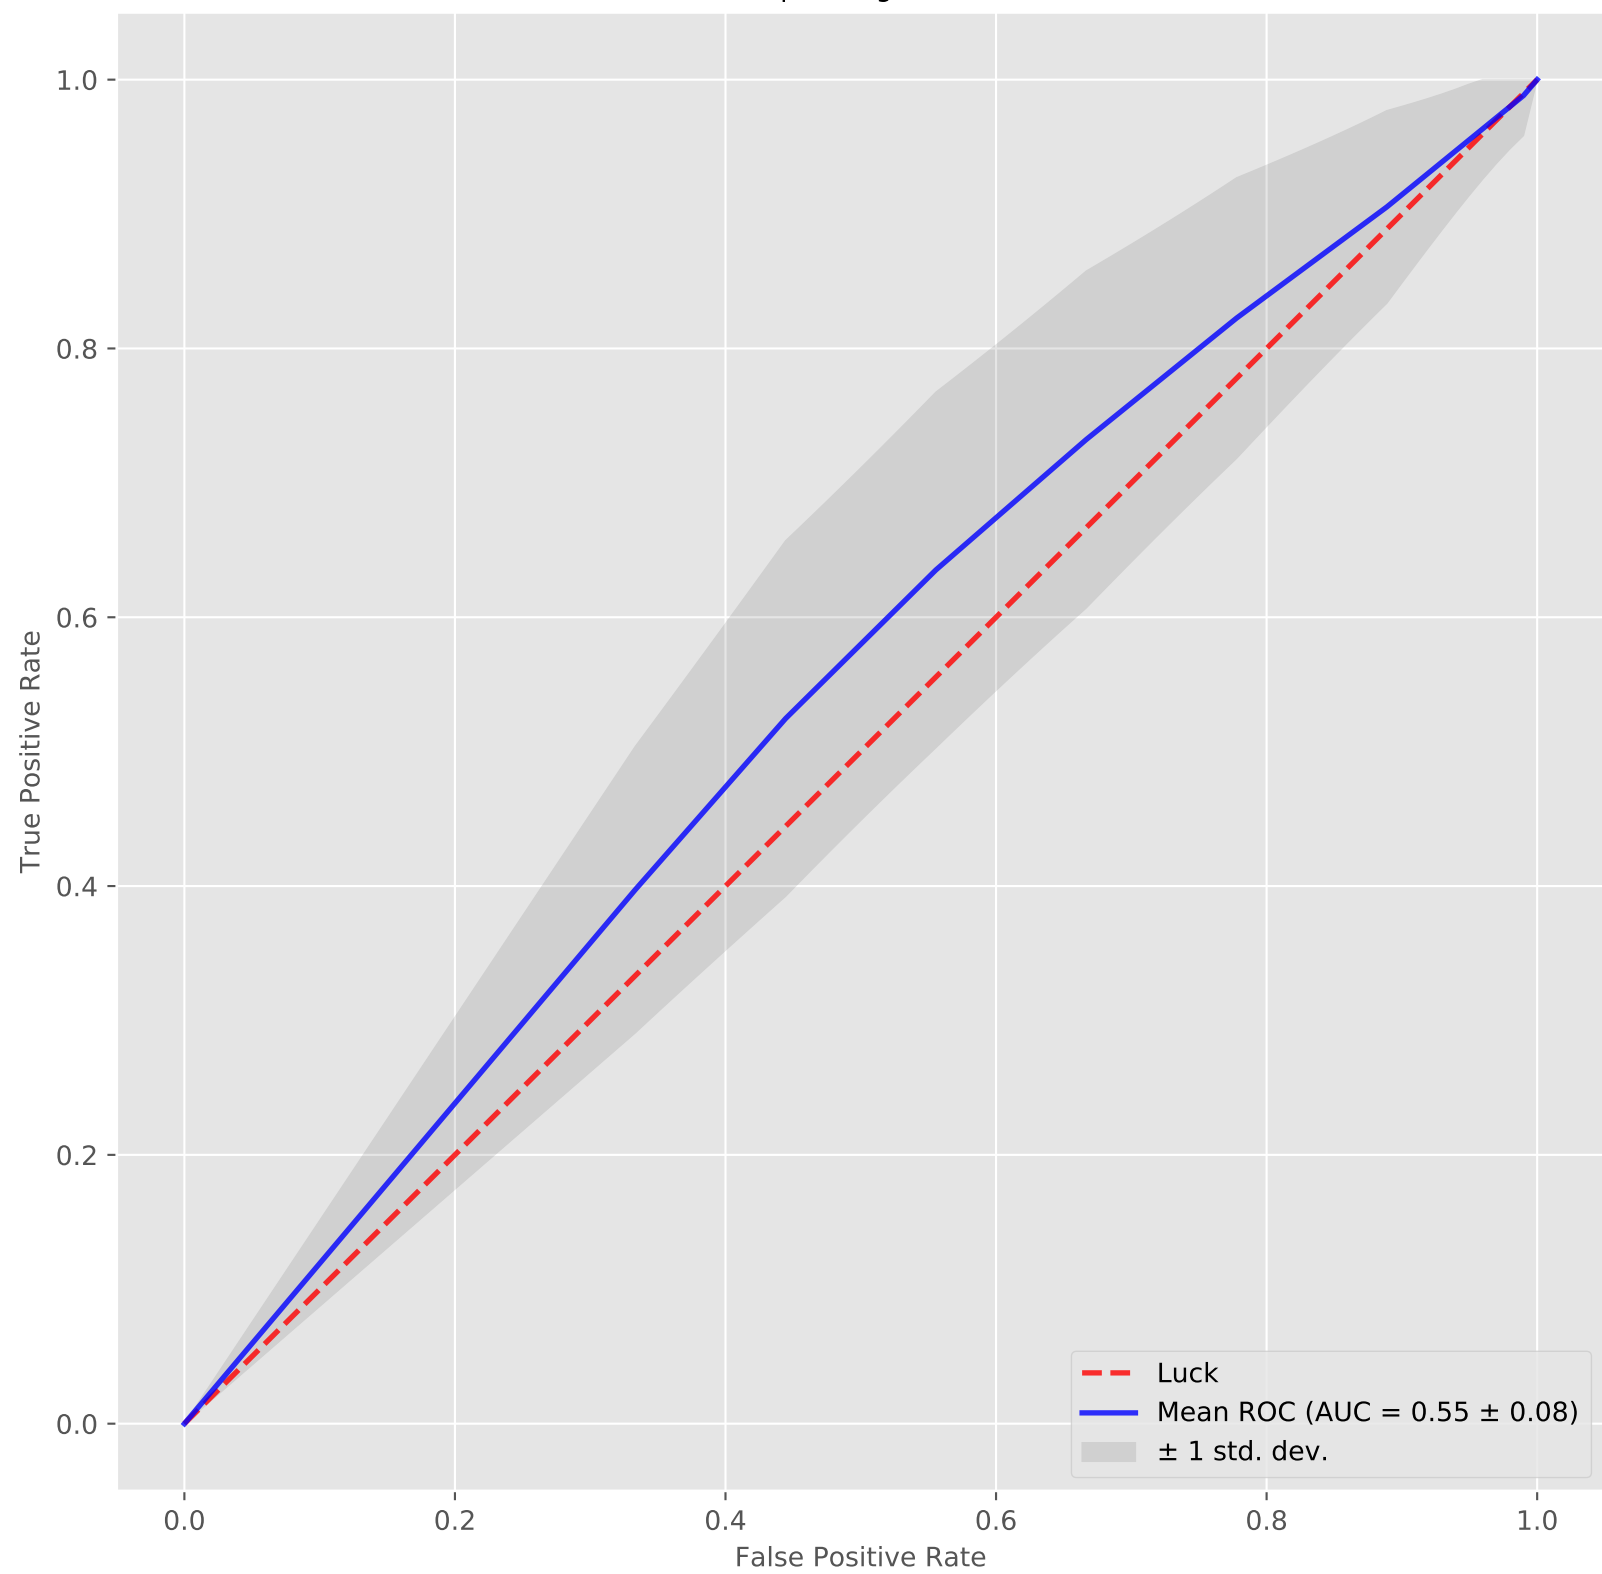

Supplement: s1 [file s1]

Receiver operating characteristic

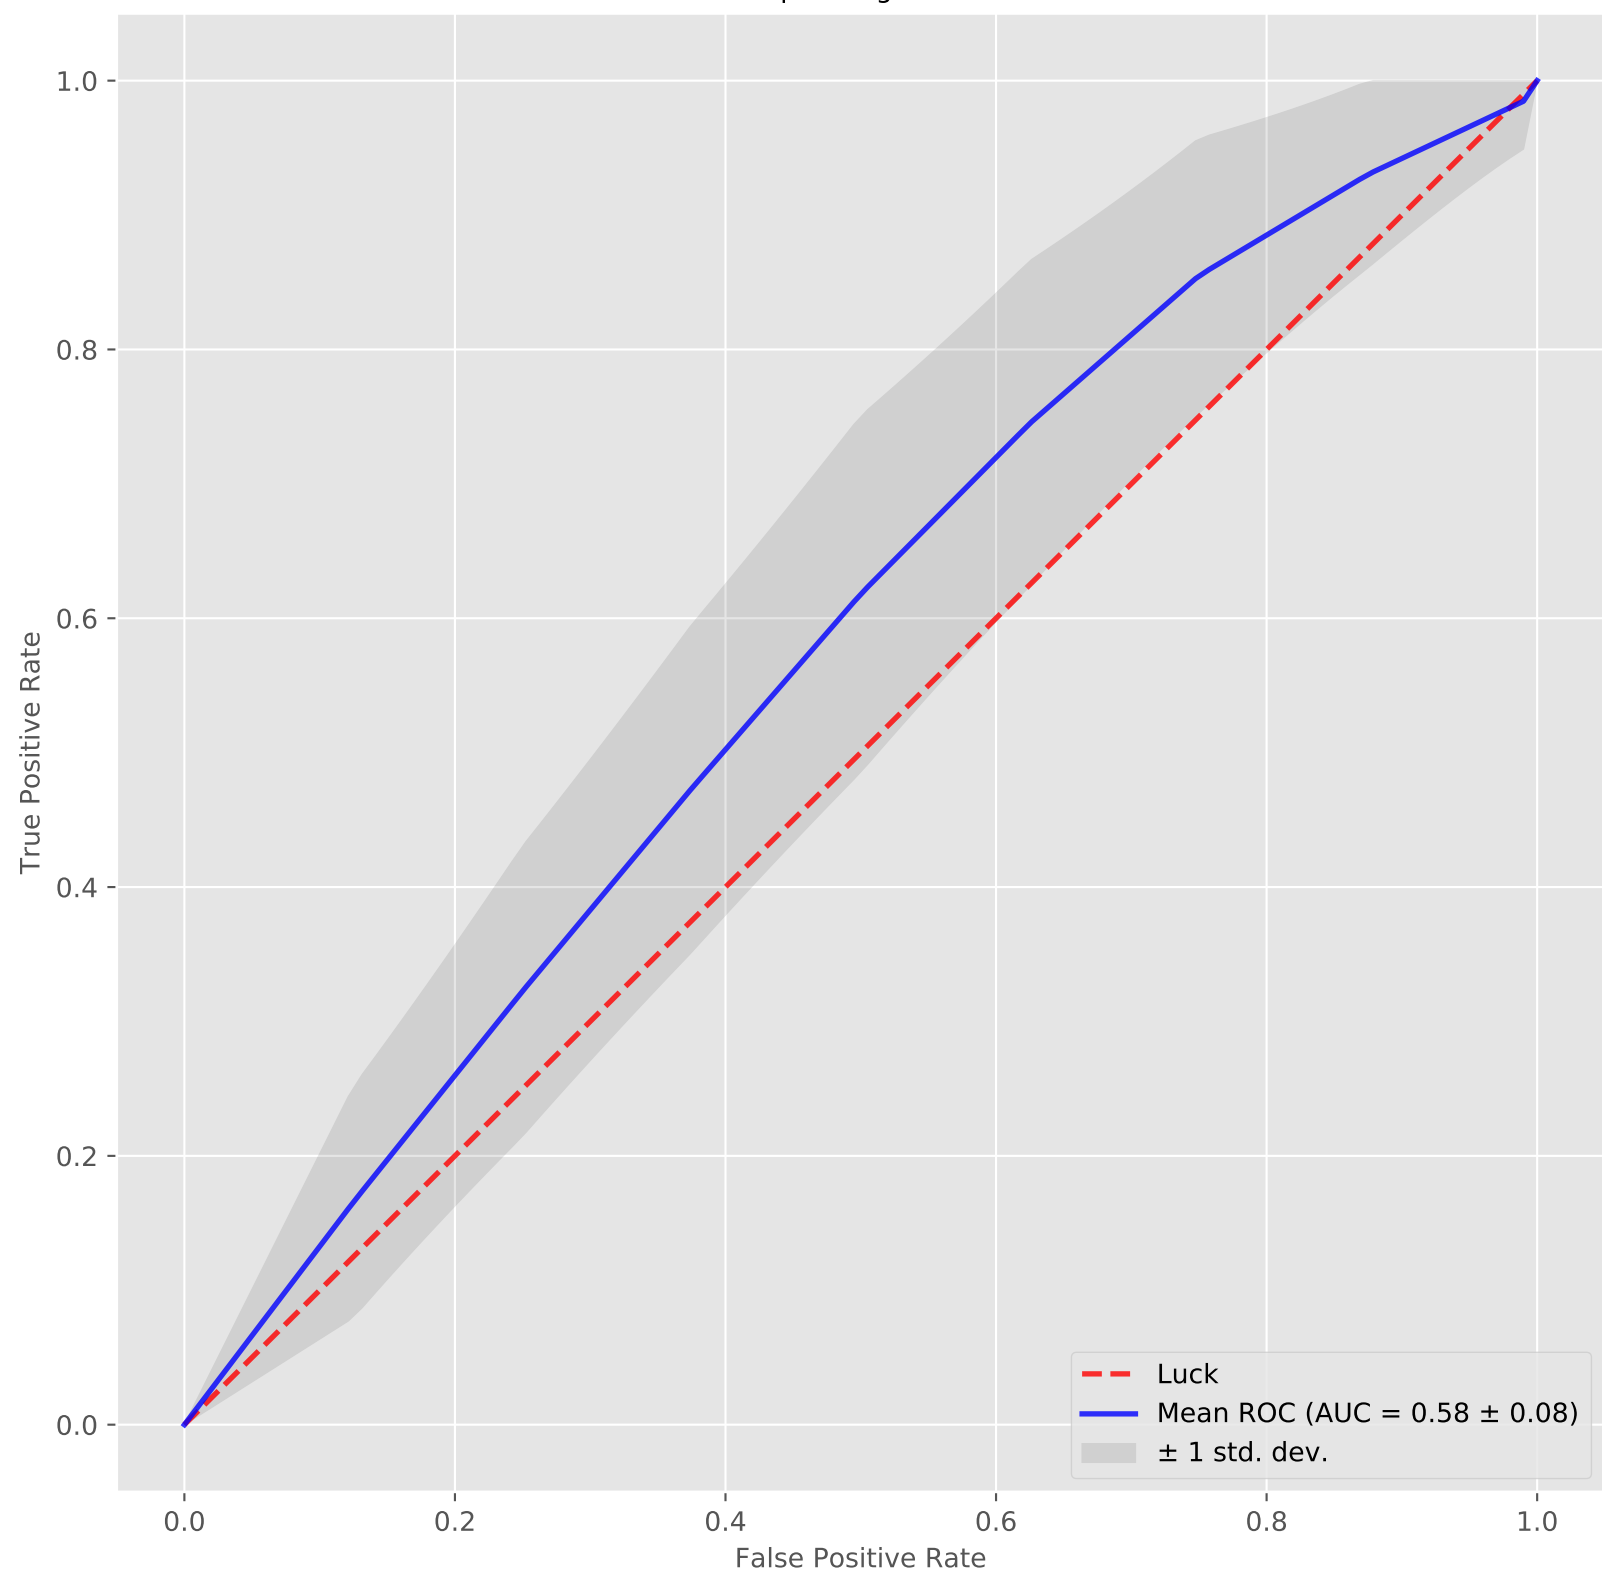

Supplement: s1 [file s1]
